# Supplementary material for: IgE type multiple myeloma exhibits hypermutated phenotype and tumor reactive T cells
Source: PubMed Central journal article supplement — J Immunother Cancer. 2022 Oct 17;10(10):e005815. doi: 10.1136/jitc-2022-005815 (PMC9577923; doi:10.1136/jitc-2022-005815), 2022-10-17

**a**

| Cluster # | Cluster name              | Cell Count |
|-----------|---------------------------|------------|
| 1         | Effector_CD8              | 11905      |
| 2         | T_gd                      | 9332       |
| 3         | Transitional/Memory_CD8   | 10668      |
| 4         | Cytotoxic_CD8             | 6707       |
| 5         | Memory_CD4                | 9736       |
| 6         | NK_cell_1                 | 6584       |
| 7         | activated/prog.exhausted_ | 4299       |
| 8         | NK_cell_2                 | 2001       |
| 9         | Naive_T_cells             | 1925       |
| 10        | Proliferating_CD8         | 862        |
| 11        | Treg                      | 777        |
| 12        | IFN-responding            | 775        |

**b**

## Canonical CD8 subset marker genes

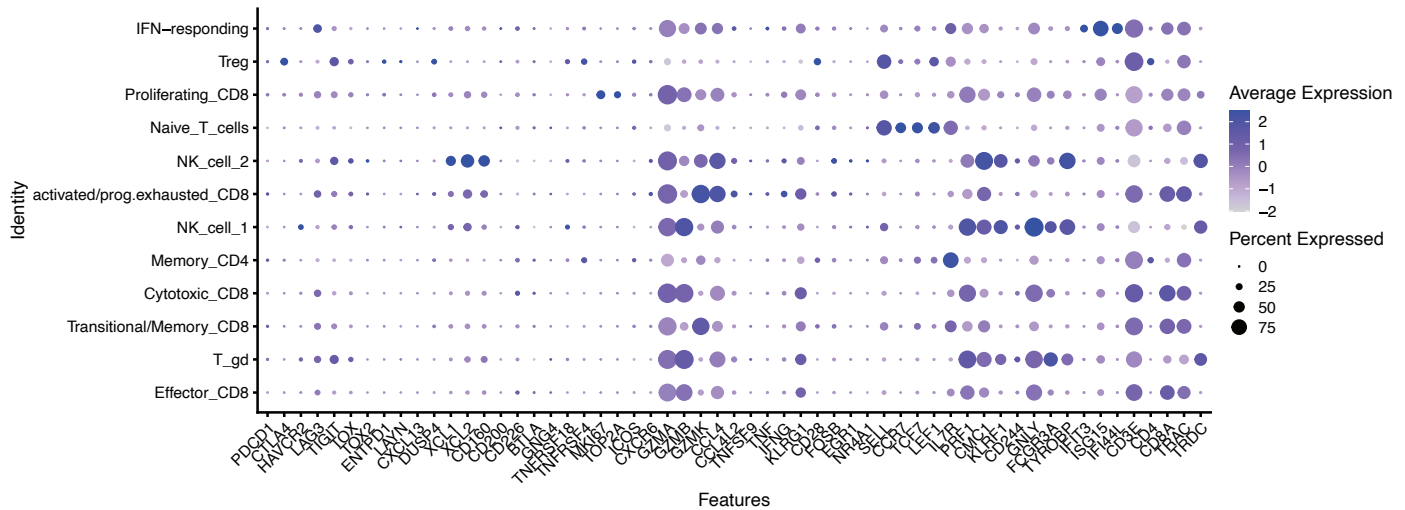**c**

## Canonical CD4 subset marker genes

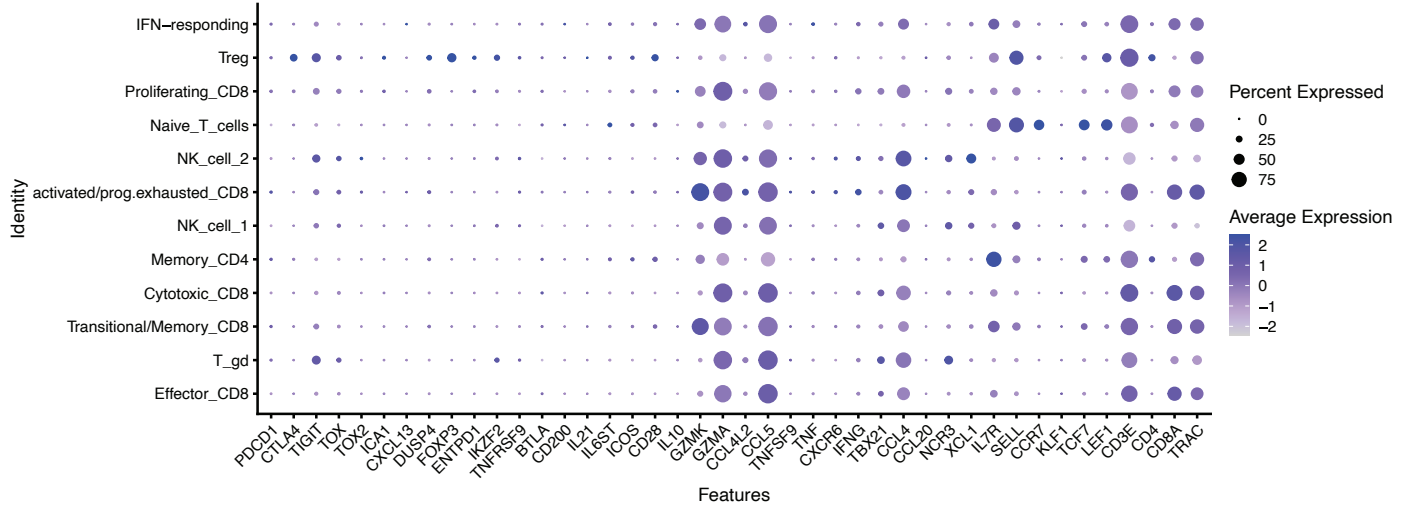

Supplement: jitc-2022-005815supp002.pdf [file jitc-2022-005815supp002.pdf]
