# Supplementary figures and images for: IgE type multiple myeloma exhibits hypermutated phenotype and tumor reactive T cells
Source: PubMed Central journal article supplement — J Immunother Cancer. 2022 Oct 17;10(10):e005815. doi: 10.1136/jitc-2022-005815 (PMC9577923; doi:10.1136/jitc-2022-005815), 2022-10-17

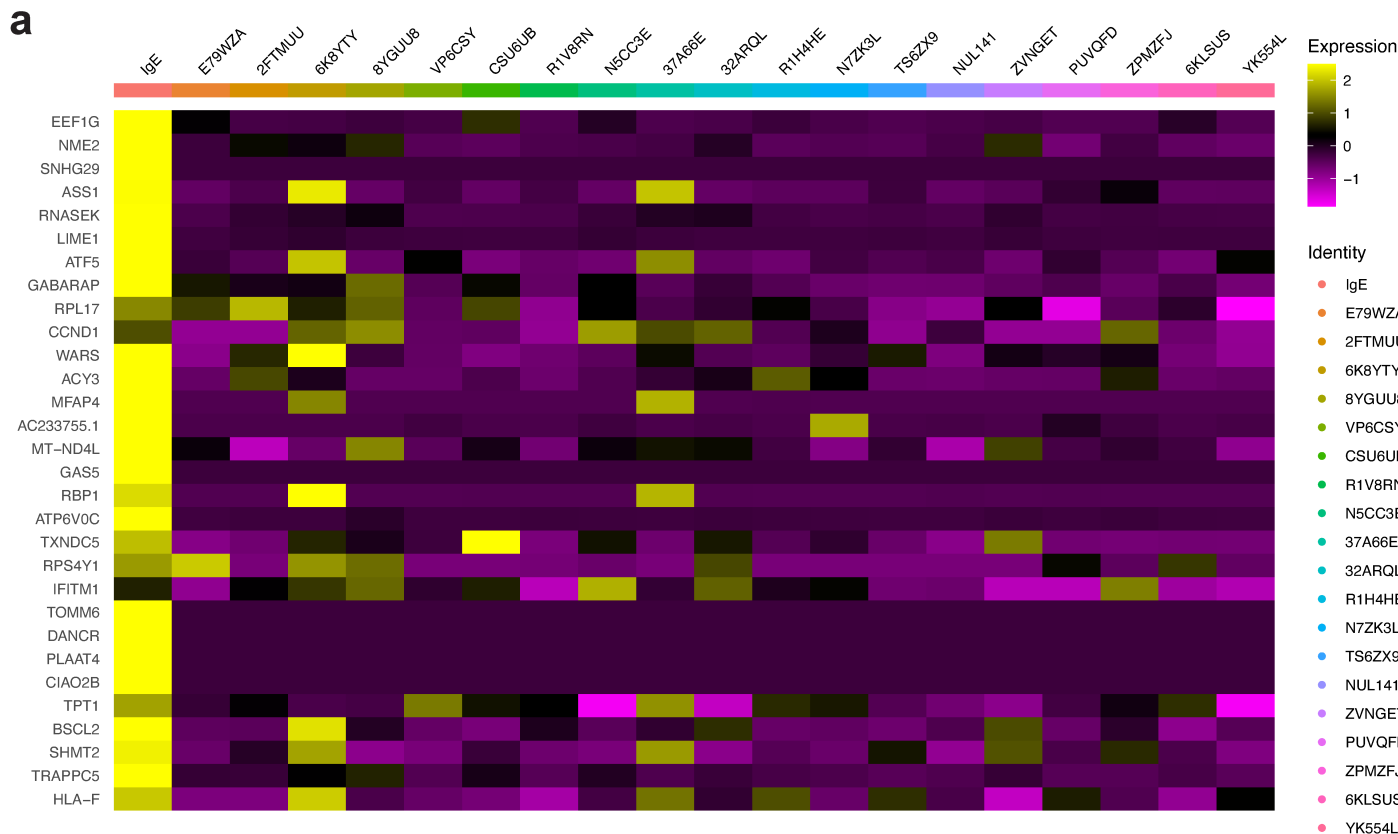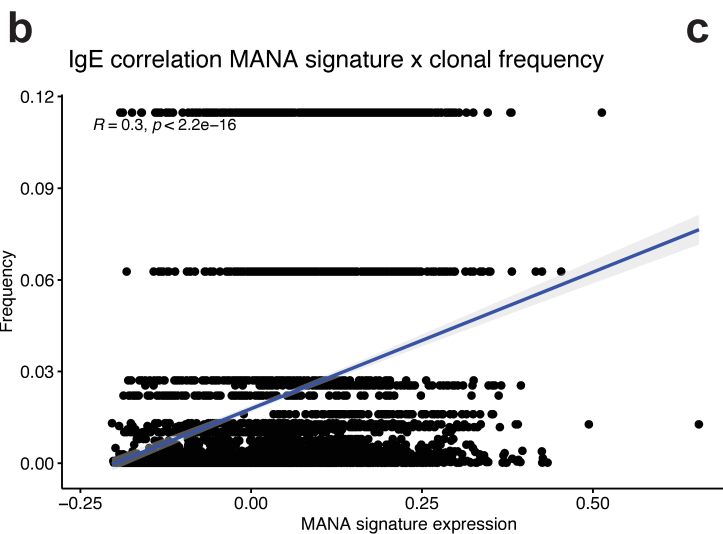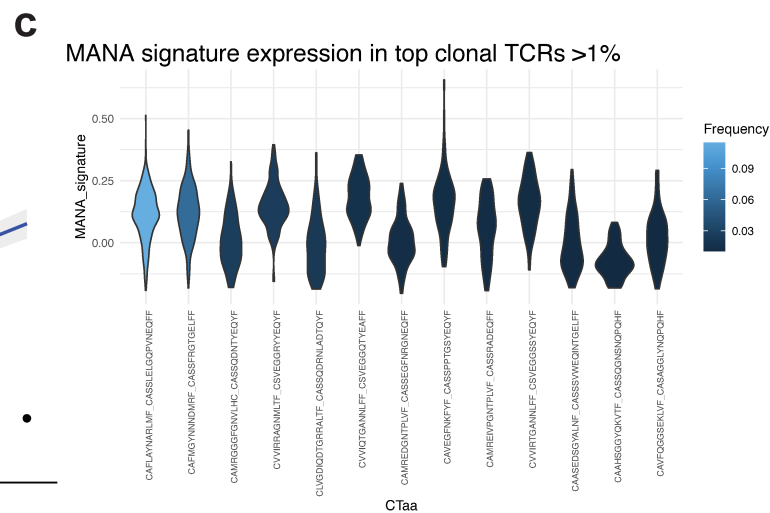

Supplement: jitc-2022-005815supp001.pdf [file jitc-2022-005815supp001.pdf]

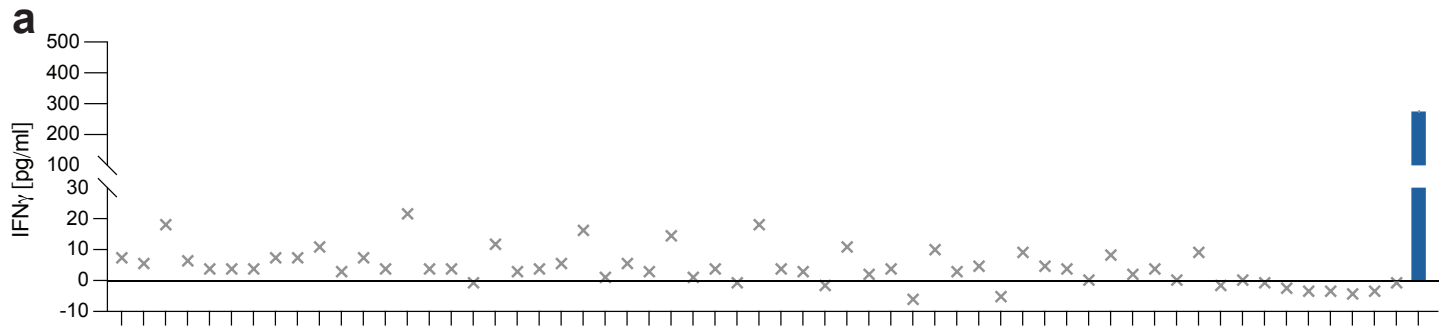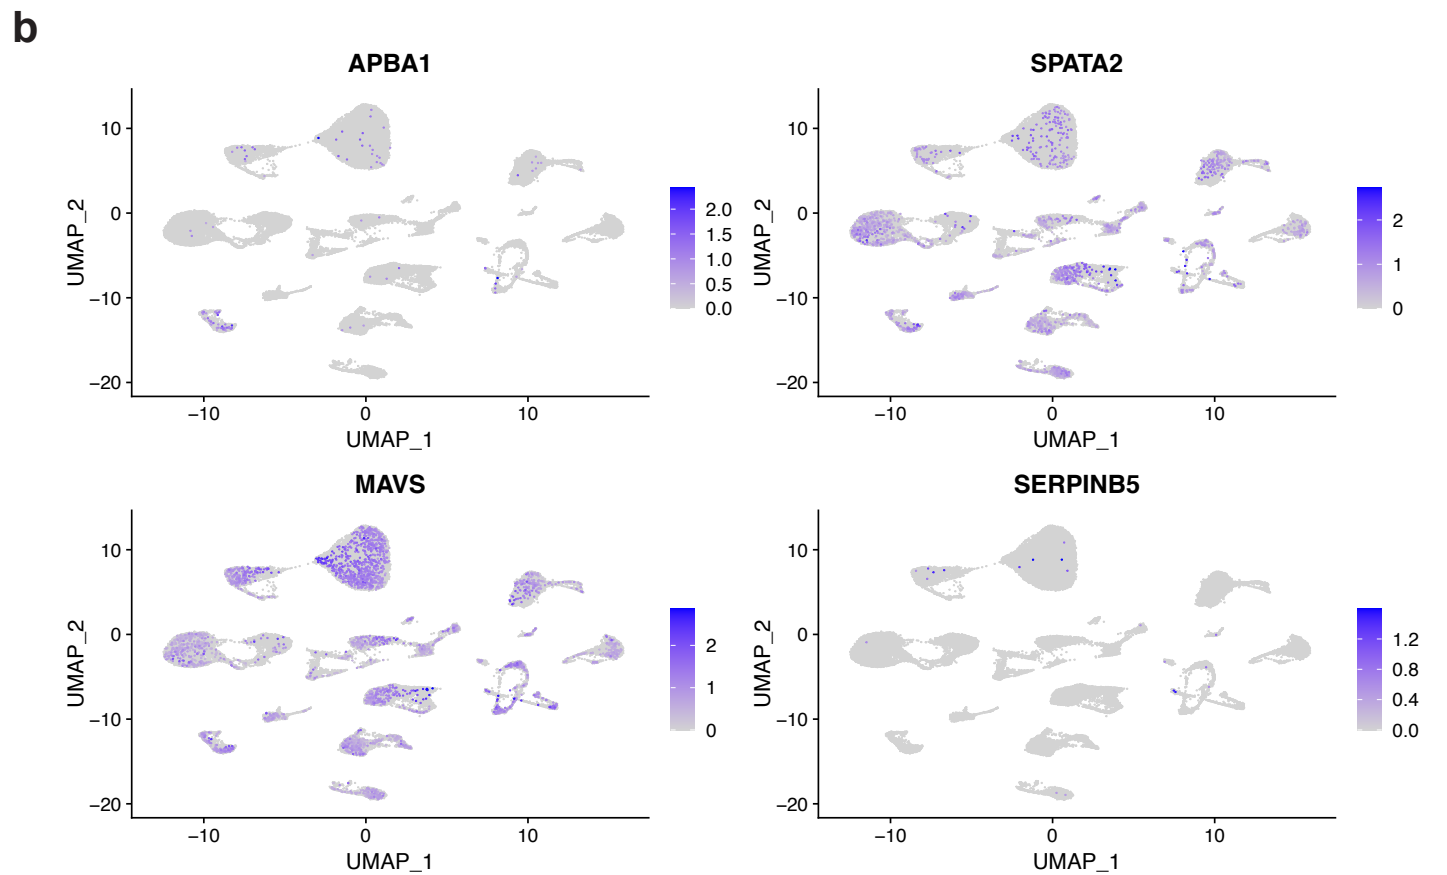

Supplement: jitc-2022-005815supp003.pdf [file jitc-2022-005815supp003.pdf]
